# Supplementary material for: Simultaneous upcycling of PET plastic waste and CO2 reduction through Co-electrolysis: a novel approach for integrating CO2 reduction and PET hydrolysate oxidation
Source: Royal Society of Chemistry journal article supplement (doi:10.1039/d3ta05726g), 2023-01-01
Supplement: d3ta05726g1.pdf [file d3ta05726g1.pdf]

## Supporting information

### **Simultaneous Upcycling of PET Plastic Waste and CO<sub>2</sub> Reduction through Co-electrolysis: A Novel Approach Integrating CO<sub>2</sub> Reduction and PET Hydrolysate Oxidation**

Kilaparthi Sravan Kumar<sup>1</sup>, Ahmed Addad<sup>2</sup>, Alexandre Barras<sup>1</sup>, Sabine Szunerits<sup>1</sup>, and Rabah  
Boukherroub<sup>1\*</sup>

<sup>1</sup>*Univ. Lille, CNRS, Univ. Polytechnique Hauts-de-France, UMR 8520 - IEMN, F-59000 Lille,  
France*

<sup>2</sup>*Univ. Lille, CNRS, UMR 8207 - UMET, F-59000 Lille, France*

*Corresponding author: [rabah.boukherroub@univ-lille.fr](mailto:rabah.boukherroub@univ-lille.fr)*

## Characterization

Scanning electron microscopy (SEM) images, energy-dispersive X-ray spectroscopy analysis (EDX) data and EDX mapping images were obtained using a JEOL JSM-7800F field-emission scanning electron microscope (SEM) operated at 15 kV. X-ray diffraction (XRD) patterns were collected on a high flux Rigaku Smartlab rotated anode, working with a copper K $\alpha$  radiation (1.5418 Å) at an applied voltage of 45 kV and an anode current of 200 mA in the  $2\theta$  range of 5–90°. Raman measurements were performed on a LabRam HR Micro-Raman system (Horiba Jobin Yvon) using a 473 nm laser diode as excitation source. The chemical composition of all materials was analyzed by X-ray photoelectron spectroscopy (XPS) using an ESCALAB 220 XL spectrometer from Vacuum generators featuring a monochromatic Al K $\alpha$  X-ray source at 1486.6 eV. Ultraviolet-visible (UV-vis) spectra were recorded by using Safas Bio-UVmc<sup>2</sup> spectrophotometer using a quartz cell (1 cm path length) and tungsten-halogen source. Absorption spectra were recorded from 200 to 800 nm at room temperature. Fourier-transform infrared spectroscopy (FTIR) analysis was performed on a Thermo Fisher Scientific (Nicolet 8700) instrument equipped with IR solution software. FTIR spectra were recorded at 6 cm<sup>-1</sup> spectral resolution in the frequency range of 700–4000 cm<sup>-1</sup> at room temperature.

The <sup>1</sup>H and <sup>13</sup>C NMR spectra were collected on a Bruker 300 MHz. The samples for NMR analysis were prepared by mixing 550  $\mu$ L of electrolyte with 50  $\mu$ L of D<sub>2</sub>O. Water suppression method was used in all <sup>1</sup>H NMR experiments.

## Mechanism of formation of Bi<sub>2</sub>O<sub>2</sub>CO<sub>3</sub> (BOC) nanosheets

When BiPO<sub>4</sub>@rGO electrode was immersed in a 0.5M KHCO<sub>3</sub> solution, no morphological changes were observed. However, when a potential of -0.8 V vs. RHE was applied for 1 h, *in situ*

transformation was seen. The following series of chemical reactions (1-5) could be responsible for the formation of BOC nanosheets.

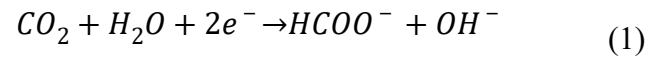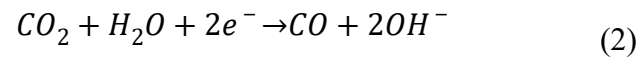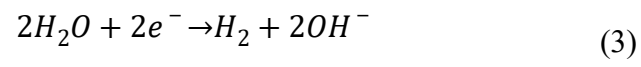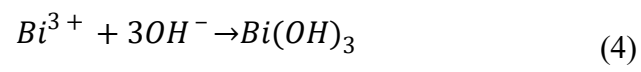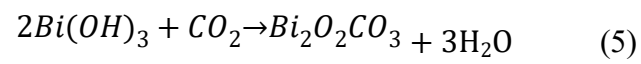

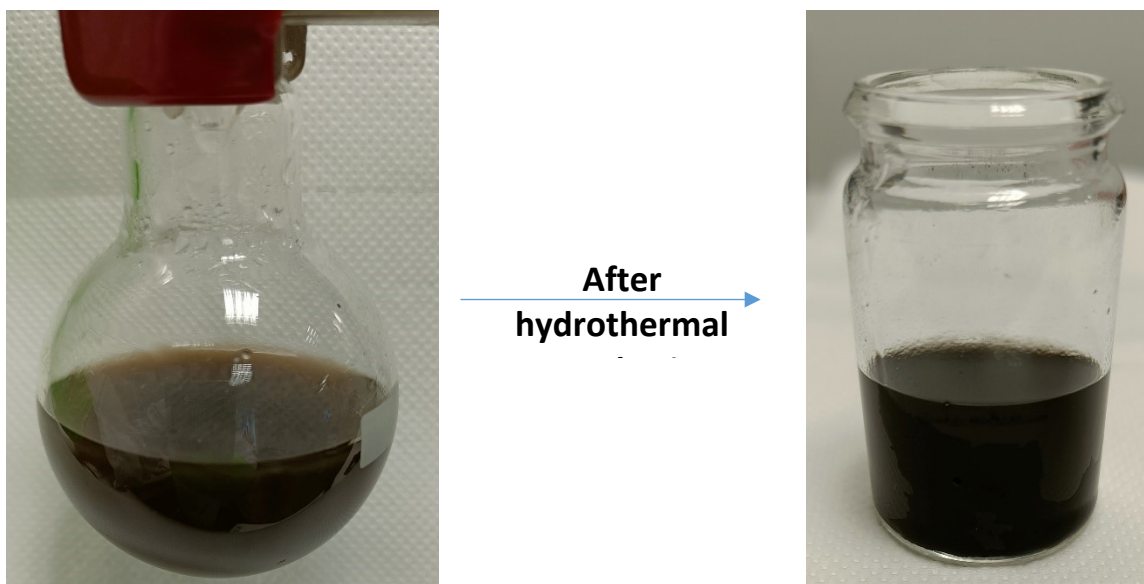

**Figure S1.** Color change from dark brown to black before (left) and after (right) hydrothermal reaction at 160 °C for 16h.

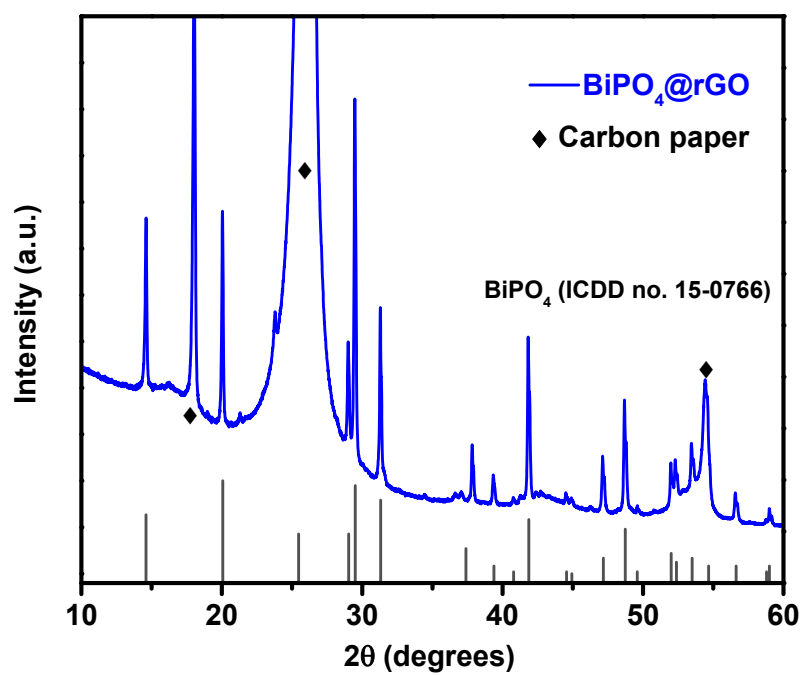

**Figure S2.** X-ray diffraction (XRD) pattern of the as-prepared BiPO<sub>4</sub>@rGO product.

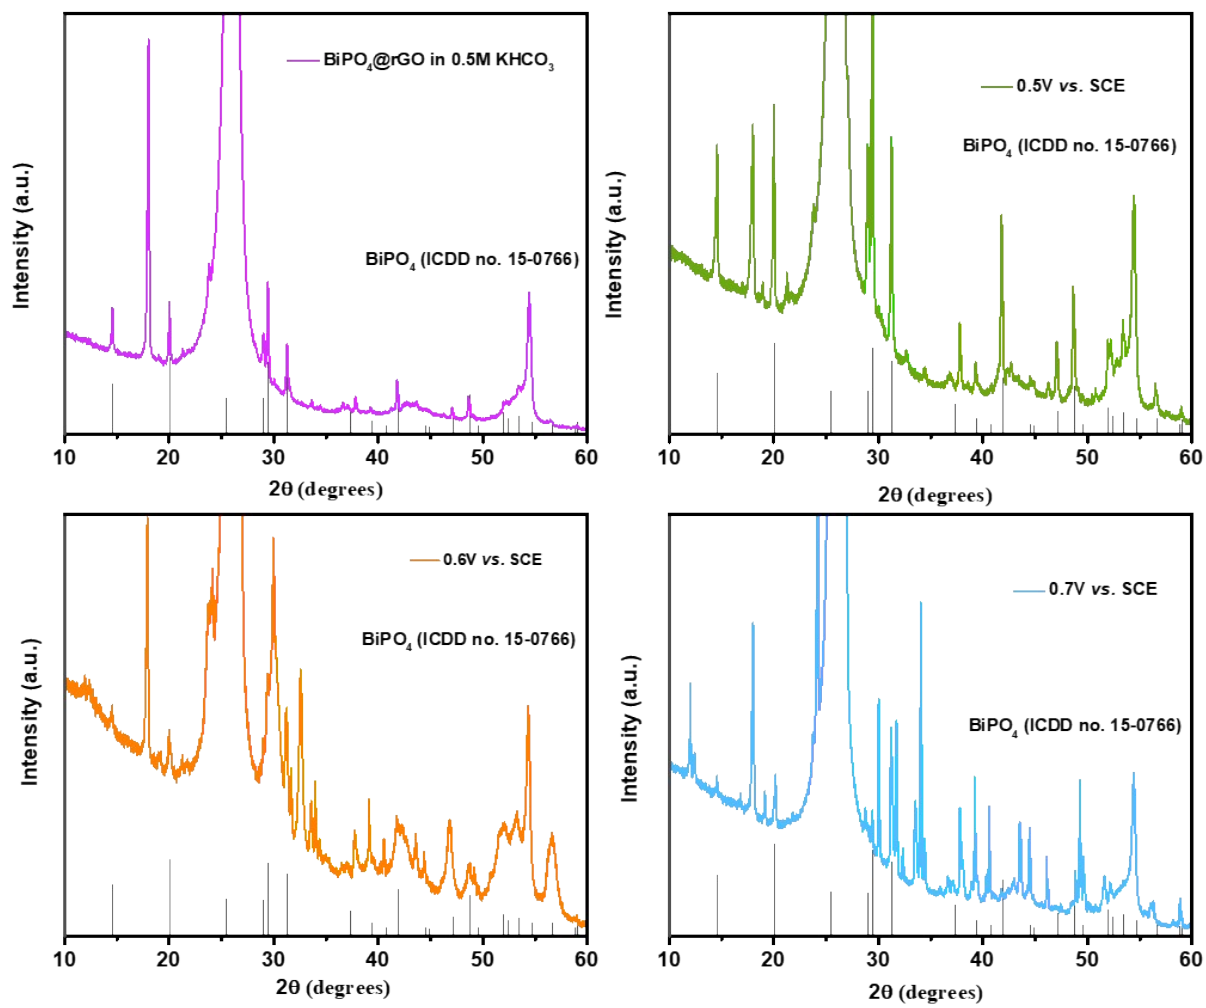

**Figure S3.** XRD patterns of electrochemical activation of BiPO<sub>4</sub>@rGO at different applied potentials.

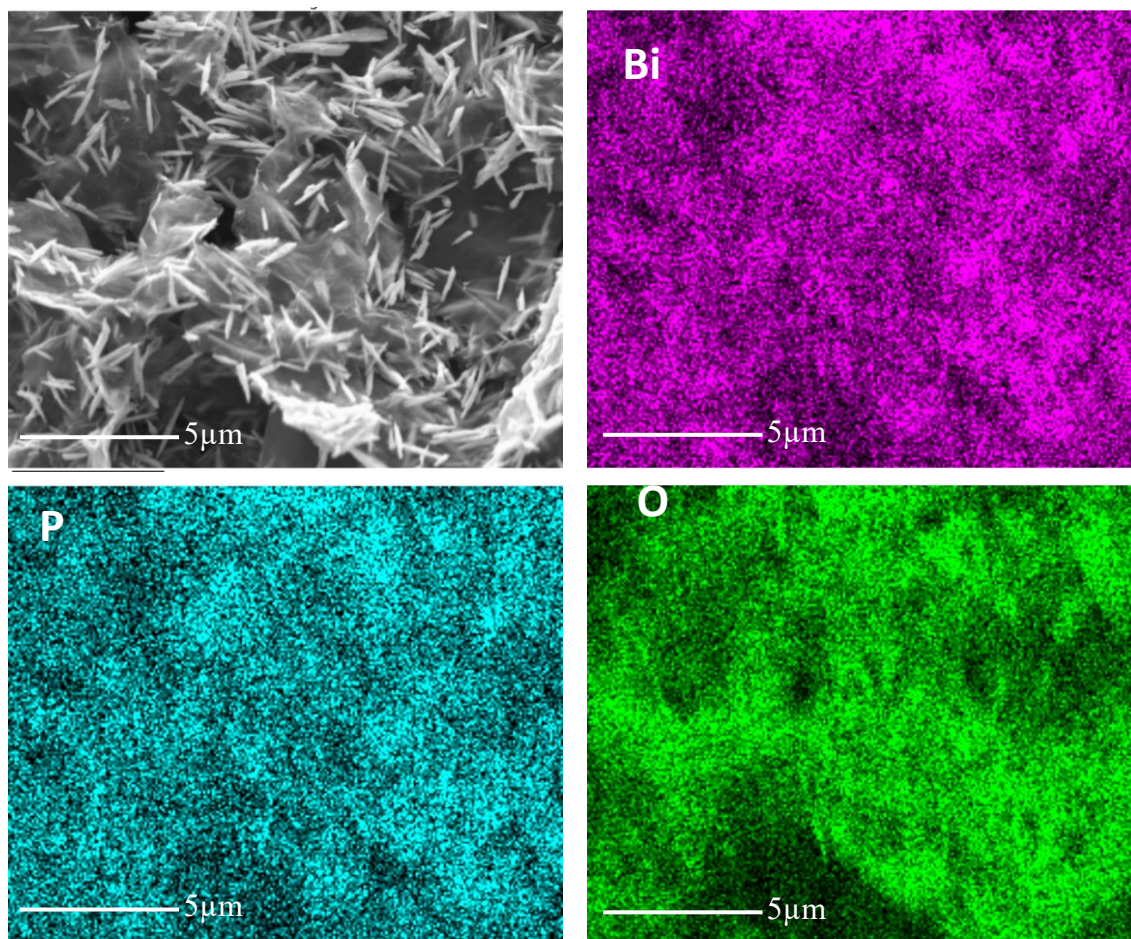

**Figure S4.** FESEM image and corresponding EDX mapping of Bi, P and O of  $\text{BiPO}_4@\text{rGO}$ .

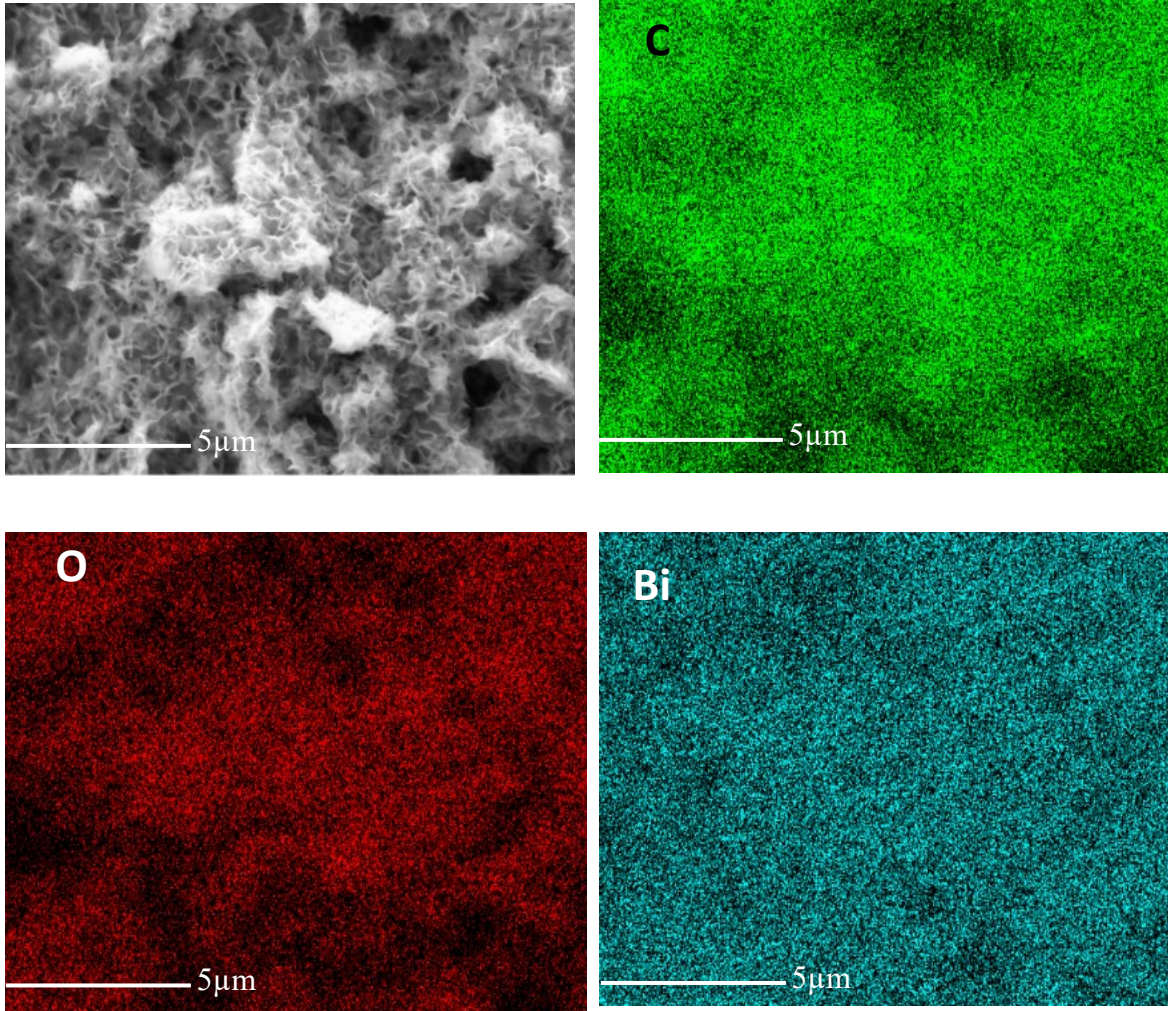

**Figure S5.** FESEM image and corresponding EDX mapping of C, O and Bi of BOC@rGO electrode.

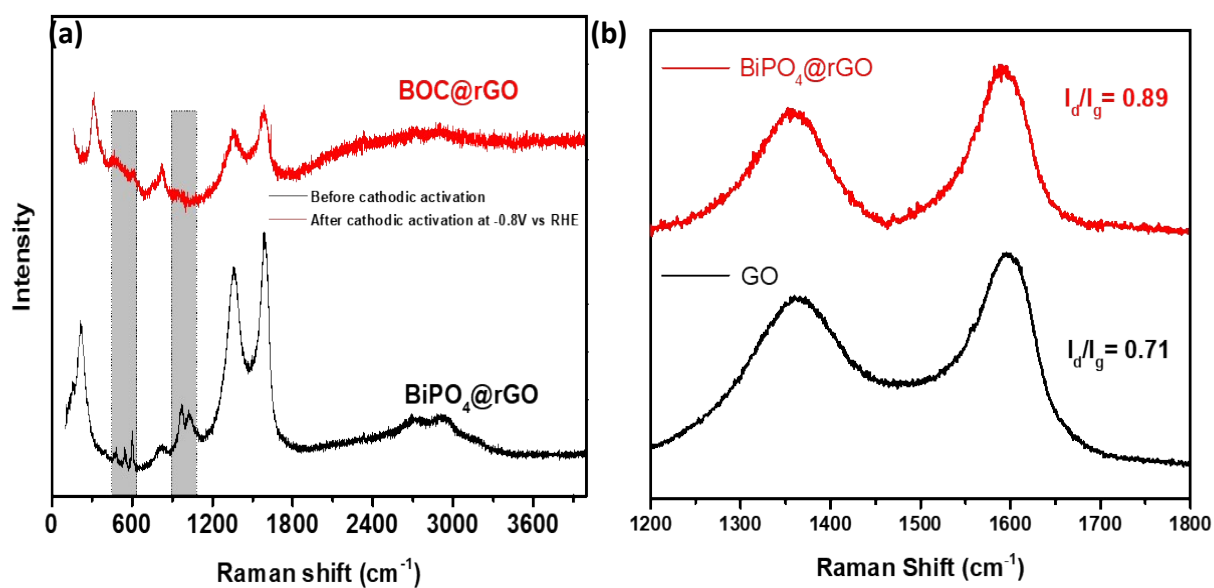

**Figure S6.** (a) Raman spectra of BOC@rGO and BiPO<sub>4</sub>@rGO. (b) I<sub>d</sub>/I<sub>g</sub> band ratio determined from the Raman spectra of BiPO<sub>4</sub>@rGO and GO.

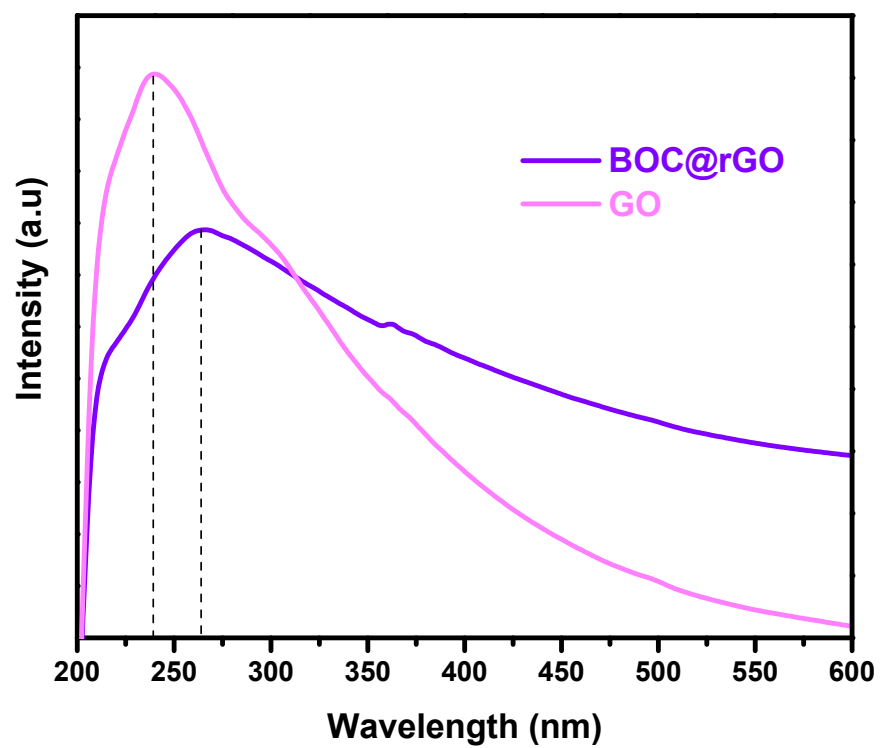

**Figure S7.** UV-visible absorption spectra of BOC@rGO and GO.



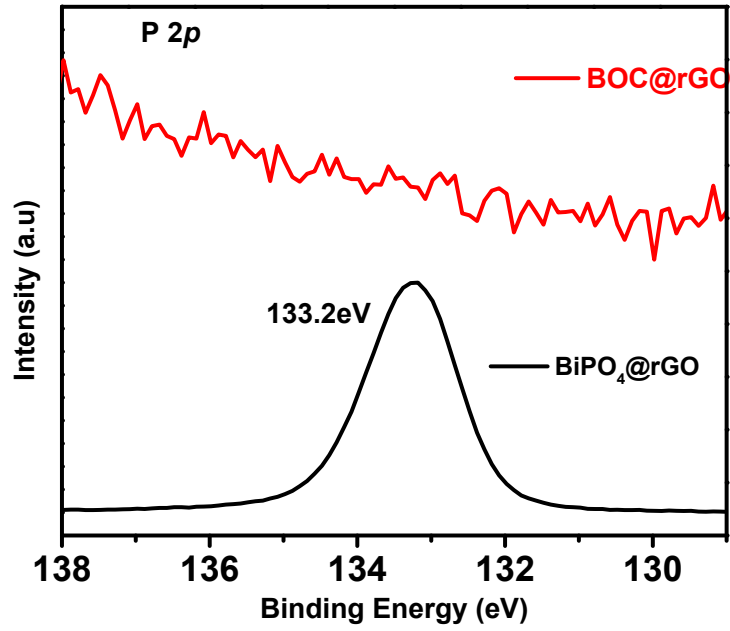

**Figure S8.** High resolution XPS spectra of the P 2p of BOC@rGO (black) and BiPO<sub>4</sub>@rGO (red).

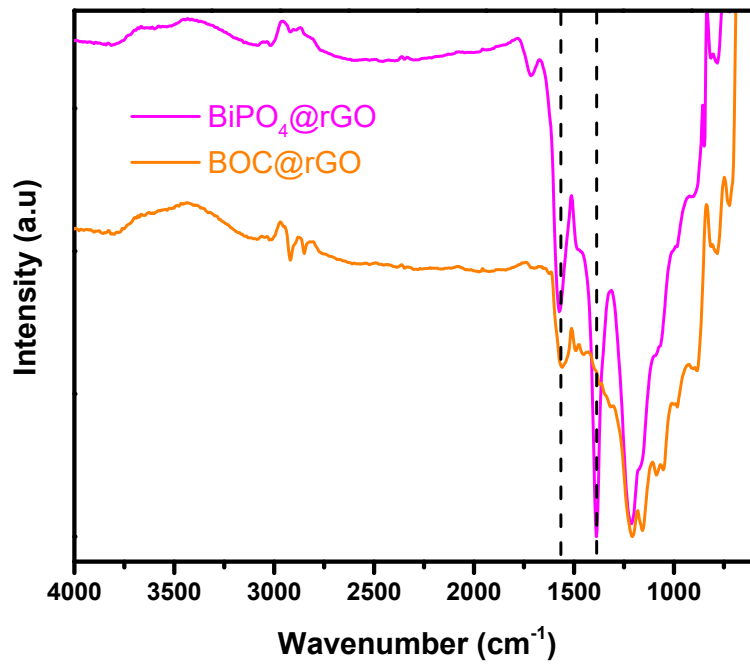

**Figure S9.** FTIR spectra of BOC@rGO and BiPO<sub>4</sub>@rGO.

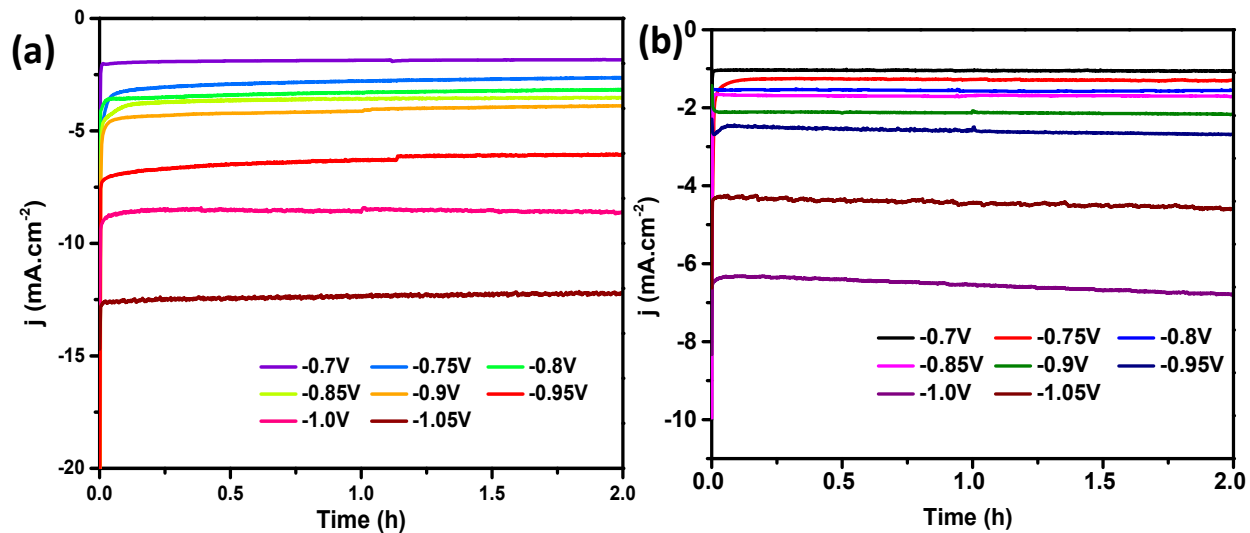

**Figure S10.** Chronoamperometry analysis at different potentials in CO<sub>2</sub>-saturated 0.1 M KHCO<sub>3</sub> solution of (a) BOC@rGO and (b) BOC.

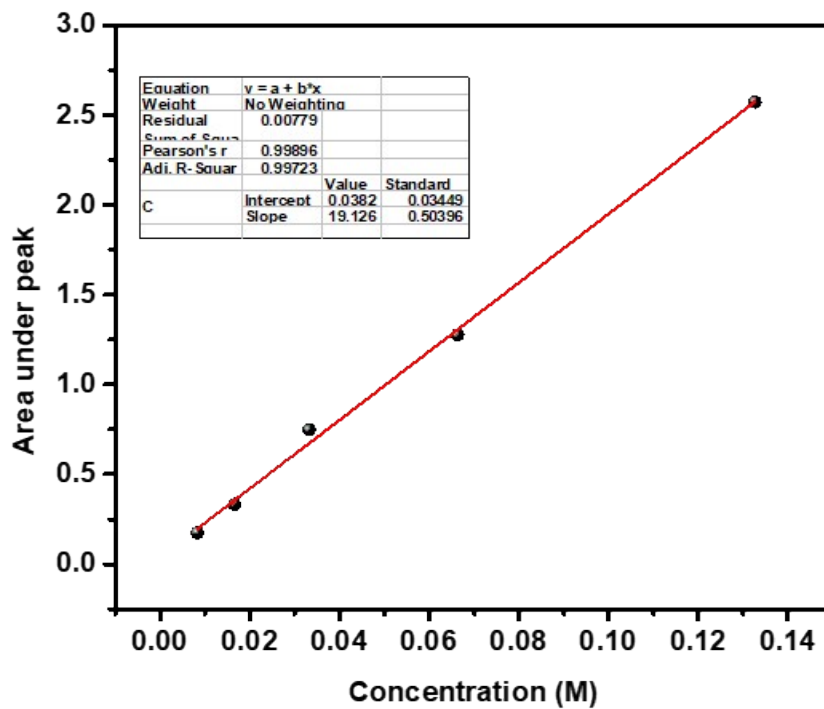

**Figure S11.** Calibration curve for formate concentration determined by <sup>1</sup>H NMR for CO<sub>2</sub>RR.

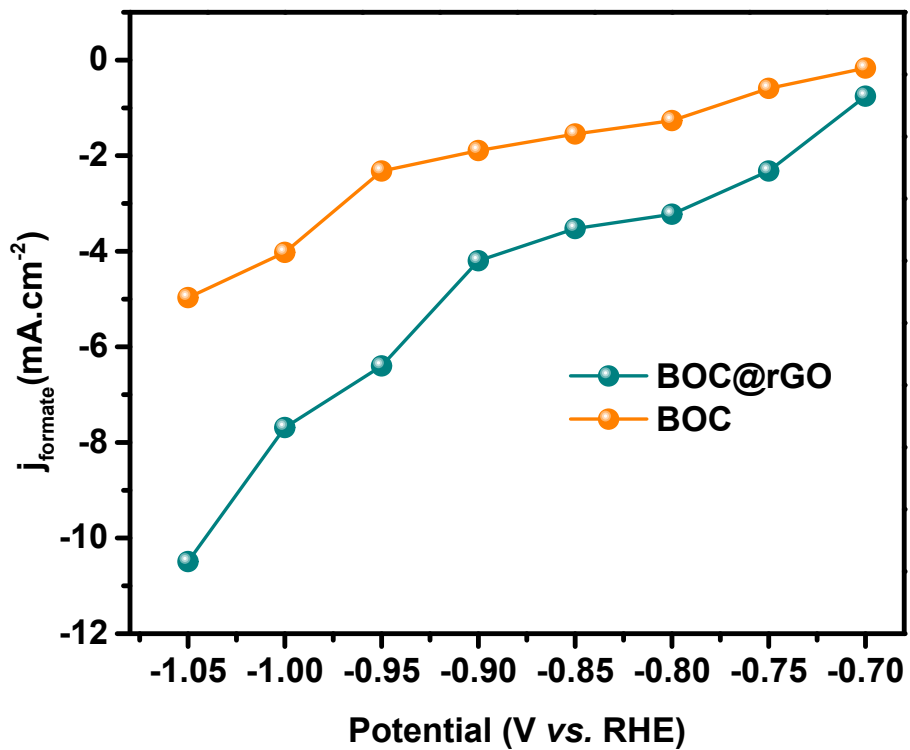

Figure S12. Partial current densities for HCOOH production of BOC@rGO and BOC.

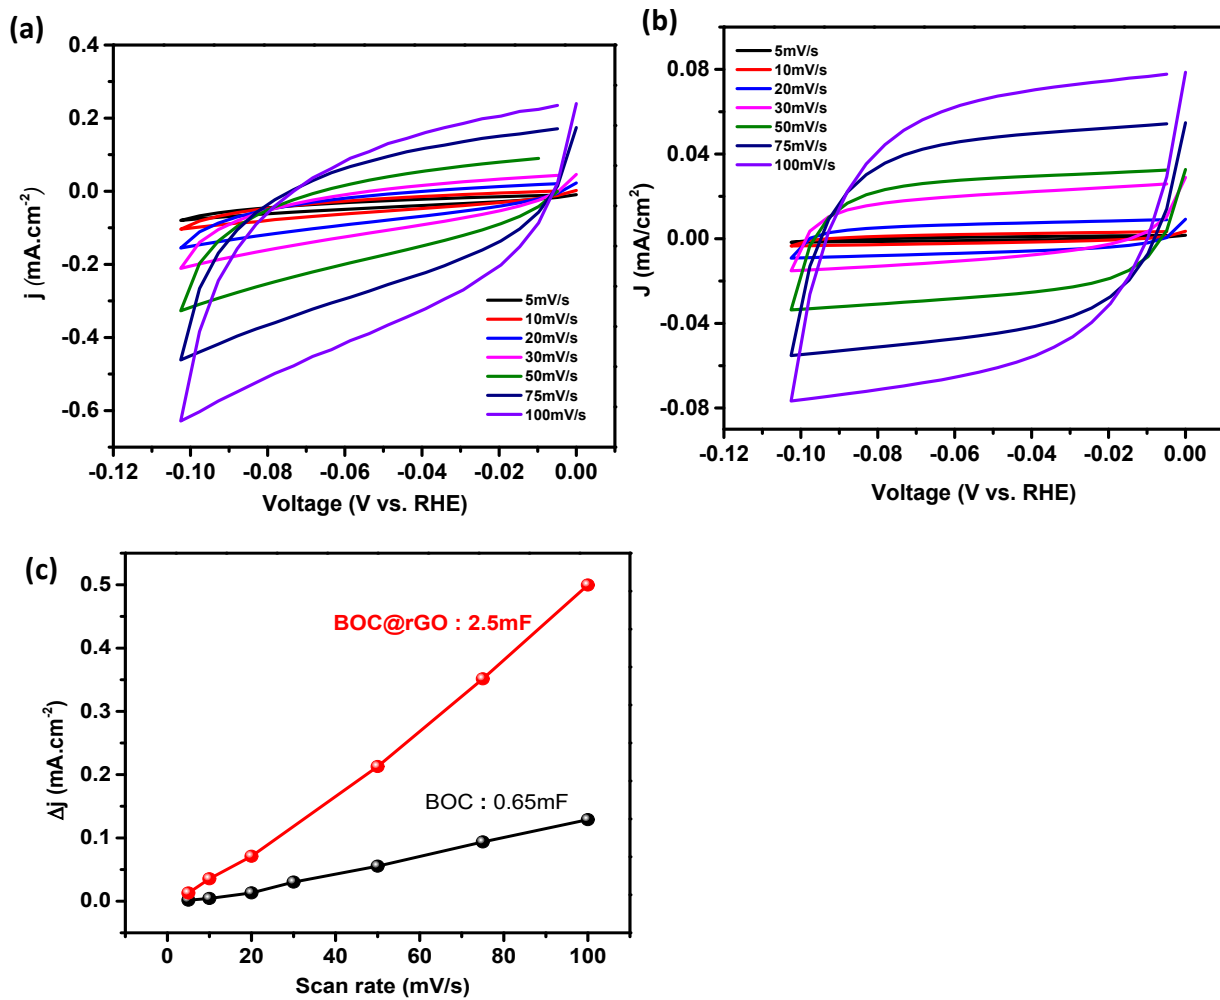

**Figure S13.** (a) CV curves of BOC@rGO and (b) BOC performed at different scan rates in Ar-saturated 0.1 M KHCO<sub>3</sub> aqueous solution in non-faradaic region; (c)  $C_{dl}$  curves of BOC@rGO and BOC.

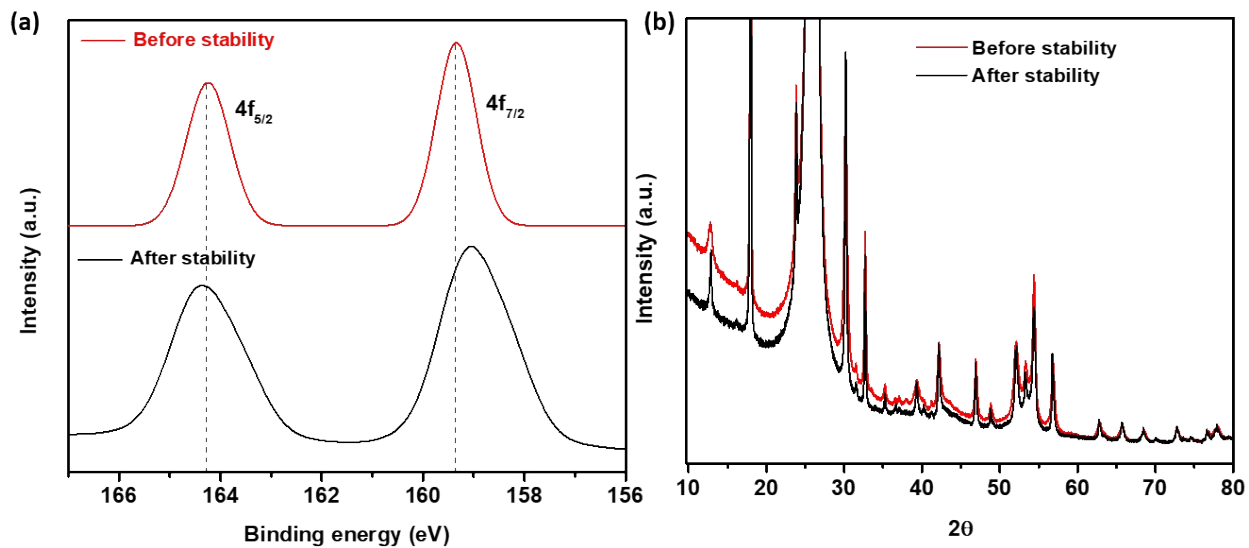

**Figure S14.** Bi 4f XPS spectra and XRD patterns of BOC@rGO after stability test. The spectra of as-prepared samples are shown for comparison.

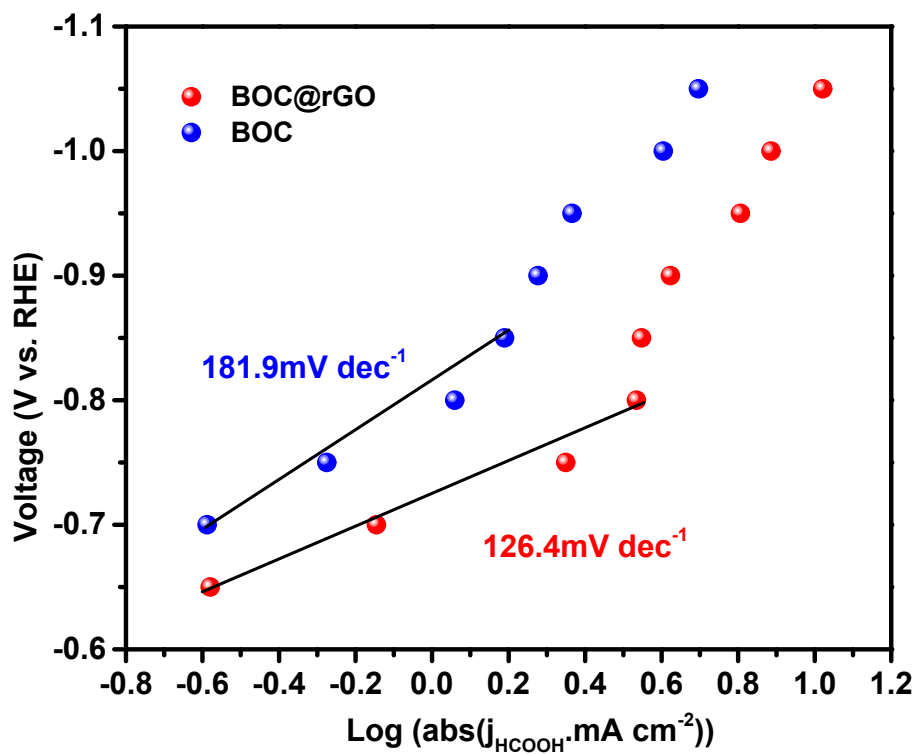

**Figure S15.** Tafel plots of BOC@rGO and BOC.

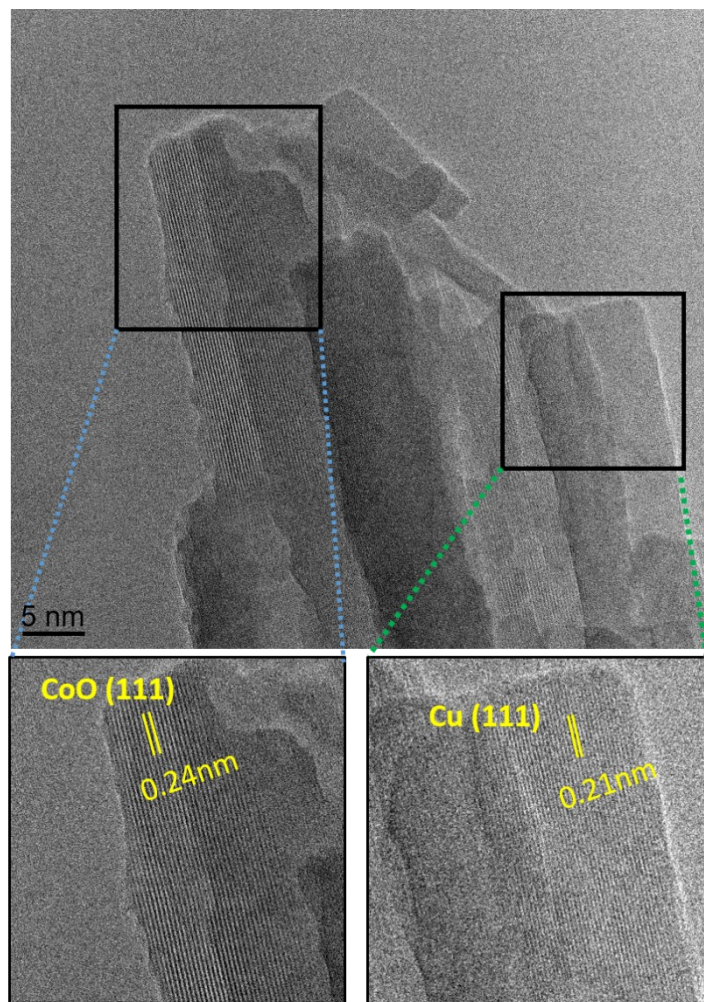

**Figure S16.** HR-TEM images of CuCoO@rGO nanocomposite.

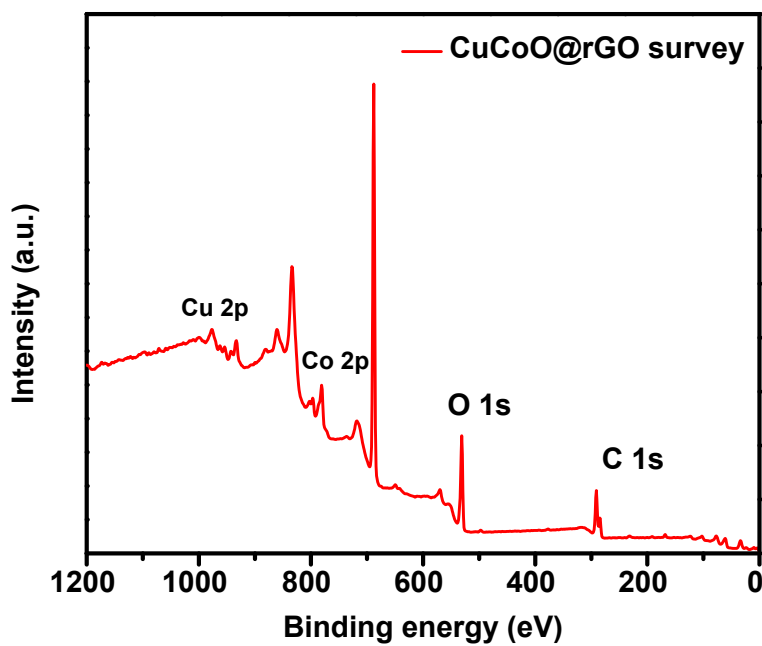

Figure S17. XPS survey spectrum of CuCoO@rGO nanocomposite.

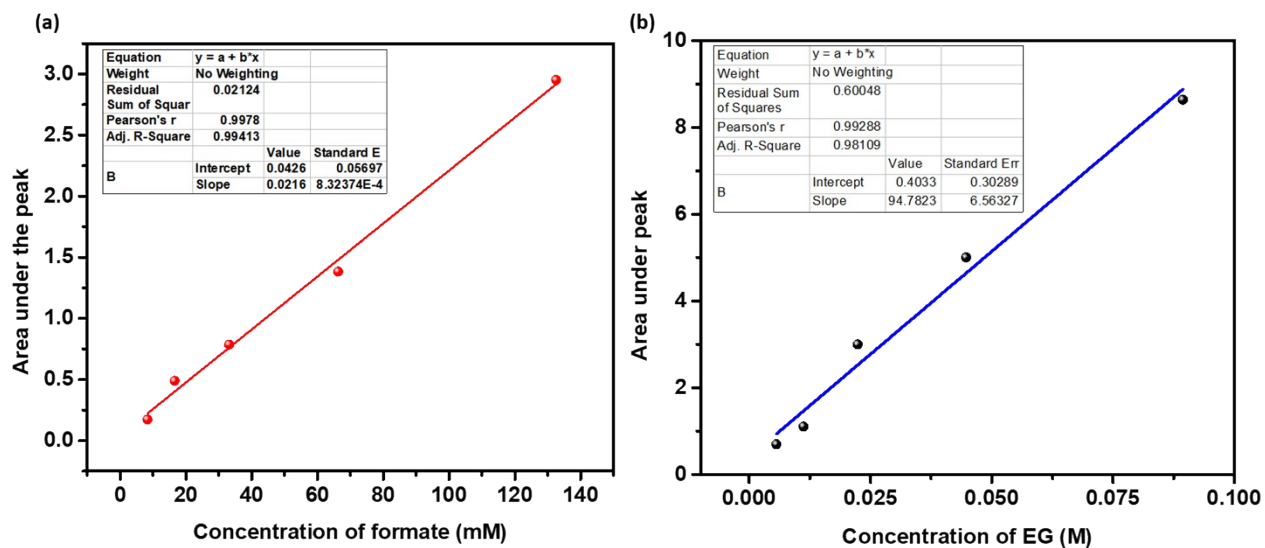

Figure S18. Calibration curves for (a) formate and (b) ethylene glycol (EG) concentrations determined by <sup>1</sup>H NMR for PET hydrolysate.

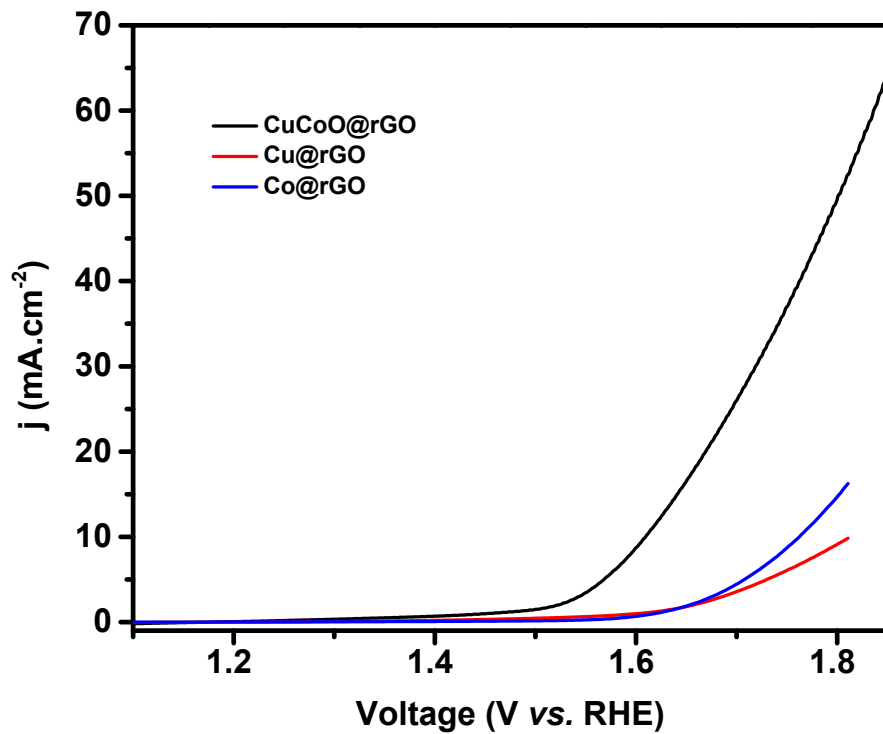

**Figure S19.** LSV curves of CuCoO@rGO, Cu@rGO and Co@rGO in 1 M KOH solution; scan rate =  $10 \text{ mV s}^{-1}$ .

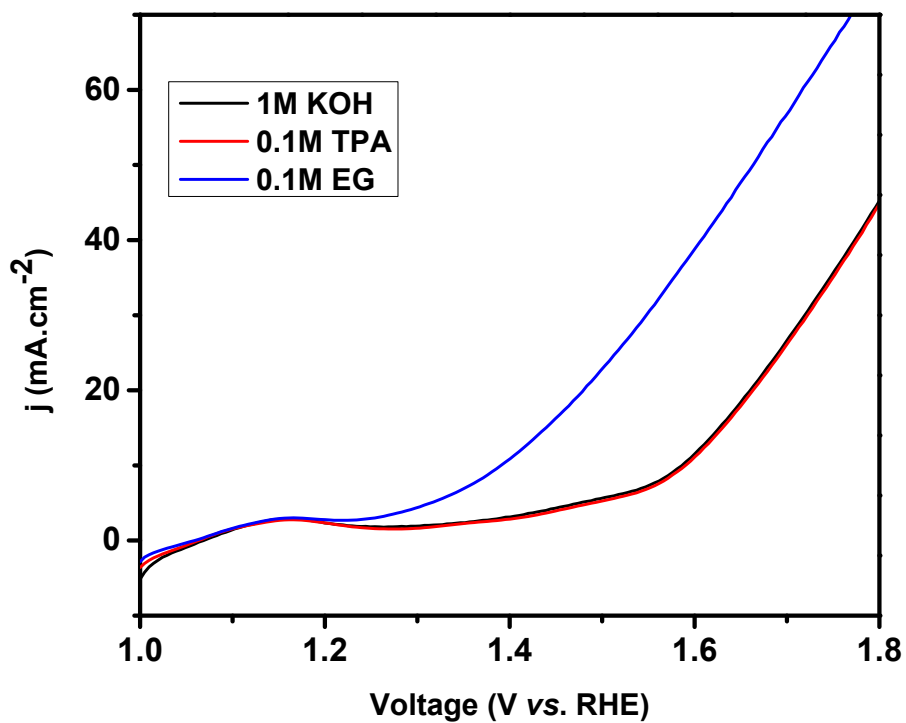

**Figure S20.** LSV curves of CuCoO@rGO in 1 M KOH, 0.1 M TPA and 0.1 M EG; scan rate =  $10 \text{ mV s}^{-1}$ .



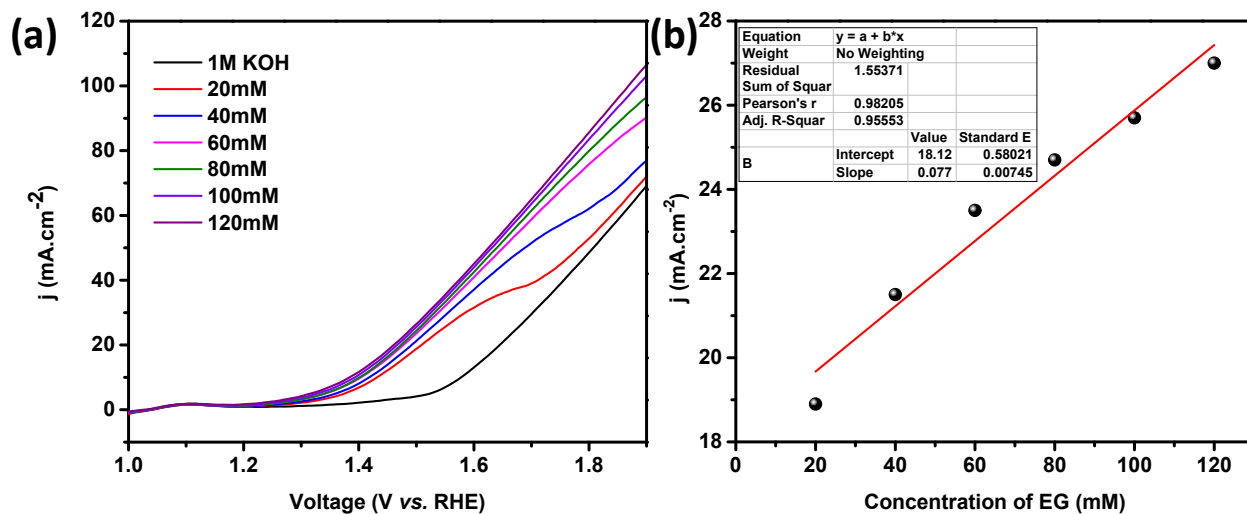

**Figure S21.** (a) LSV curves of CuCoO@rGO at varying concentrations of EG, scan rate = 10 mV s<sup>-1</sup>. (b) Linear curve of catalytic current for EG oxidation vs. EG concentration at 1.5 V vs. RHE.

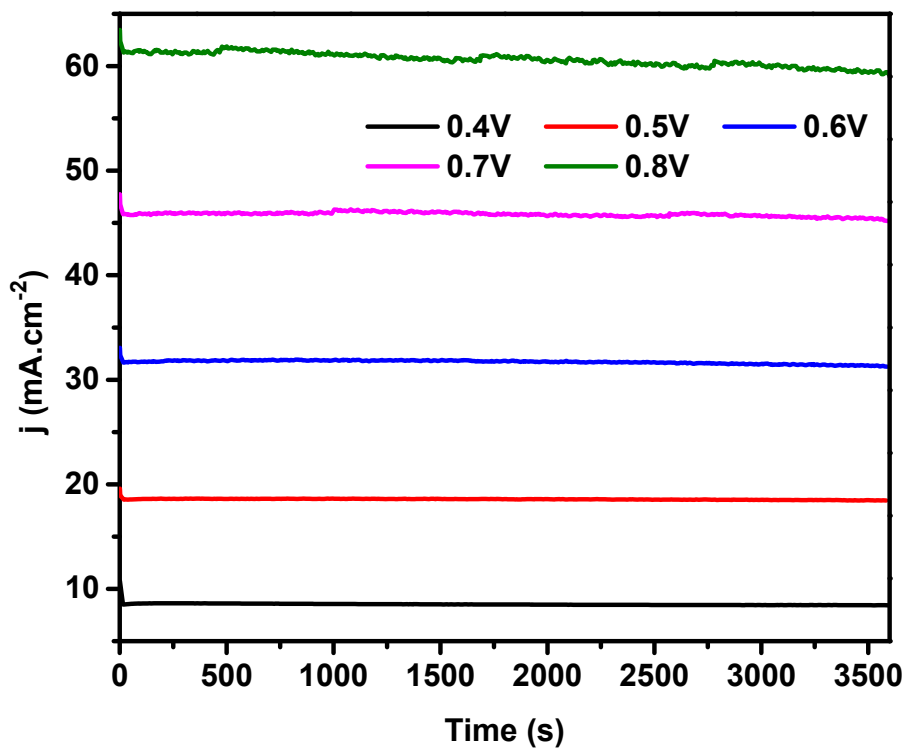

**Figure S22.** Controlled potential electrolysis of PET hydrolysate solution using CuCoO@rGO.

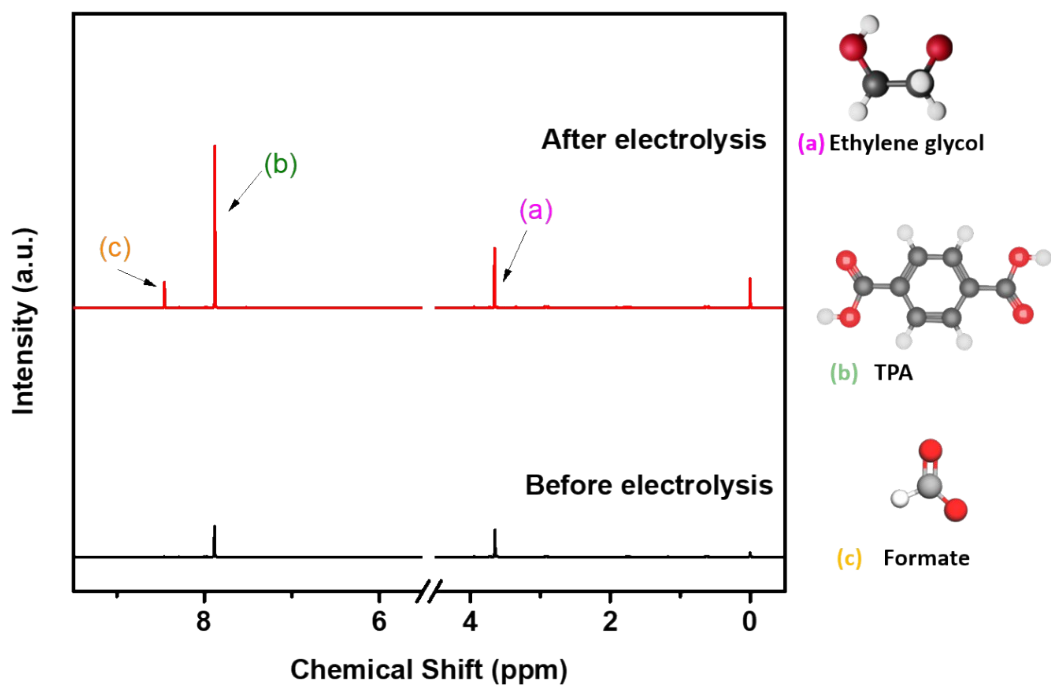

**Figure S23.**  $^1\text{H}$  NMR before and after electrolysis of PET hydrolysate solution using  $\text{CuCoO@rGO}$  nanocomposite.

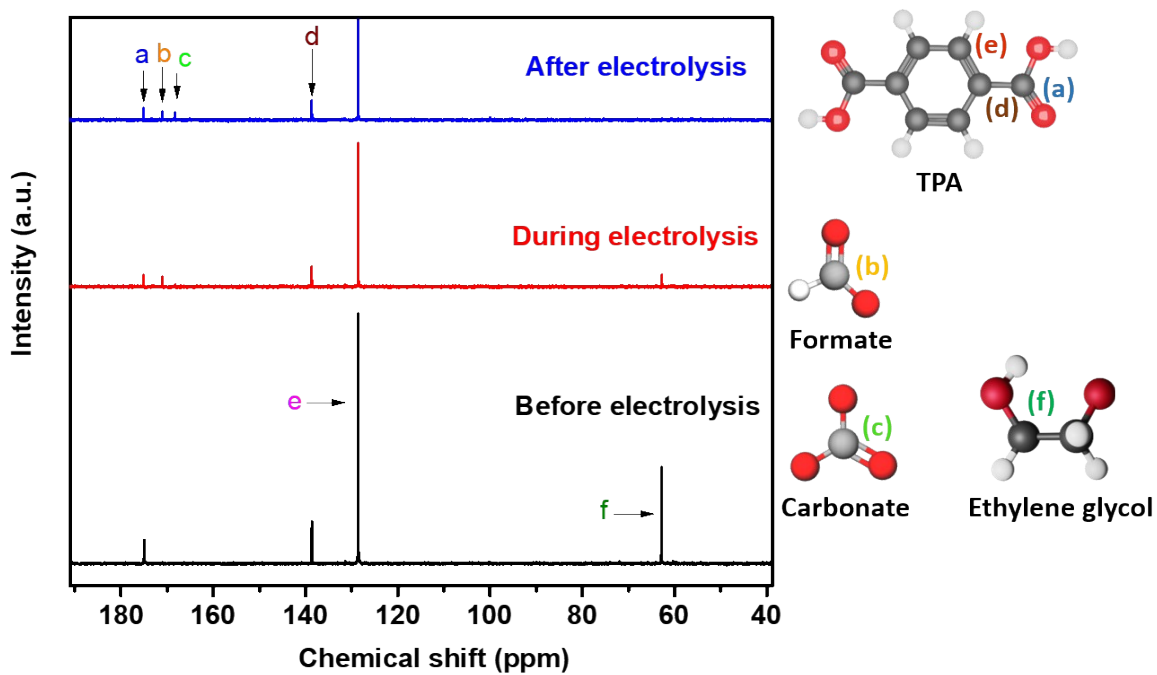

**Figure S24.**  $^{13}\text{C}$  NMR before, during and after electrolysis of PET hydrolysate solution using  $\text{CuCoO@rGO}$ .

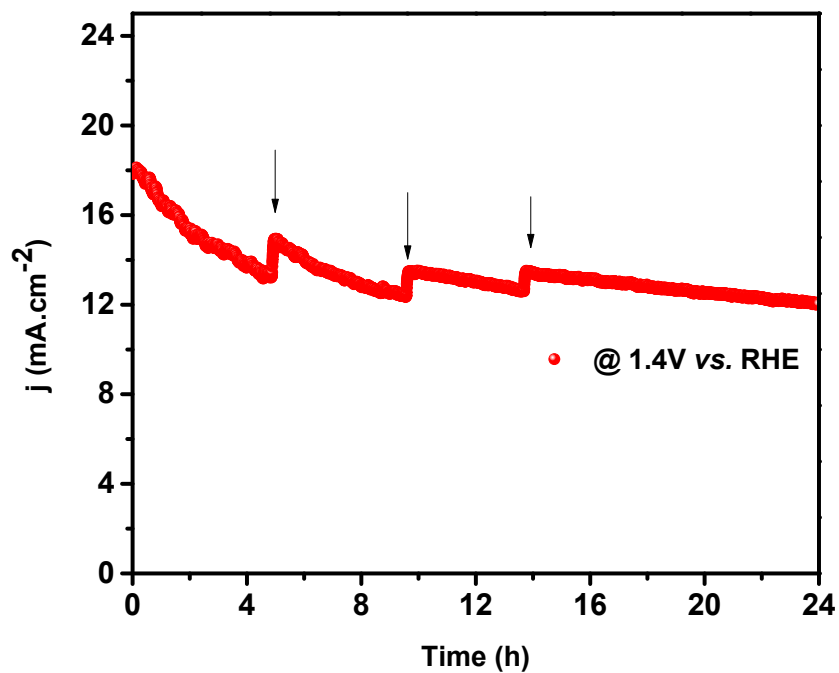

**Figure S25.** Long-term electrolysis upon subsequent addition of 20 mM ethylene glycol (EG) at different intervals of time.

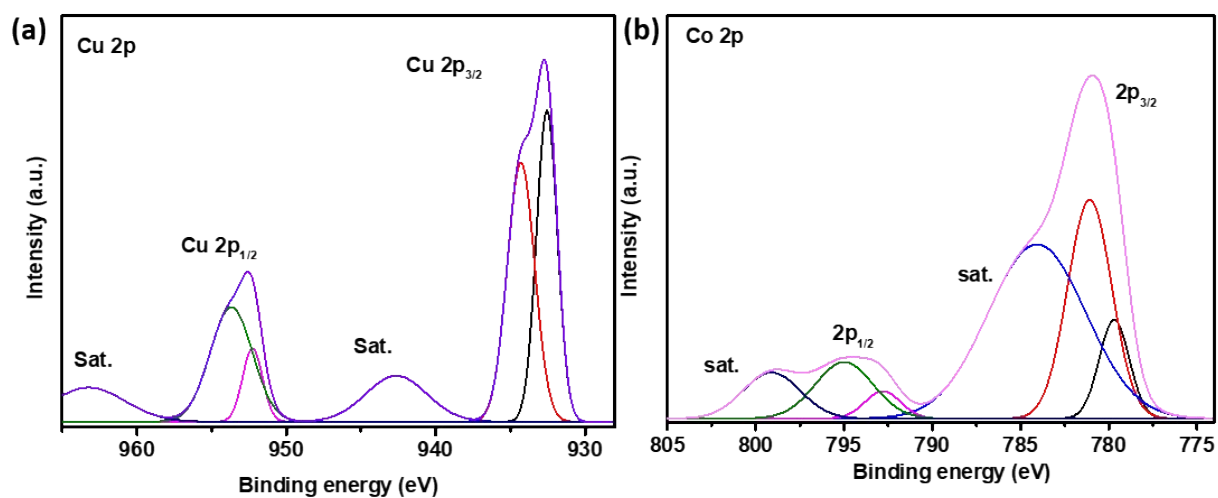

**Figure S26.** (a) Cu 2p and (b) Co 2p XPS spectra after electrolysis of PET hydrolysate solution using CuCoO@rGO nanocomposite.

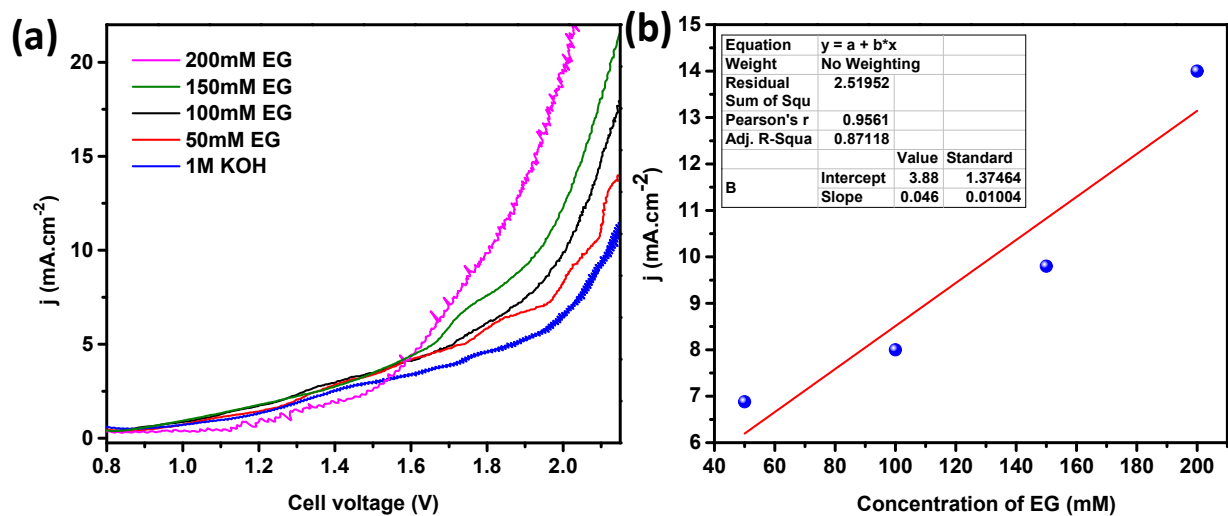

**Figure S27.** (a) LSV curves of CuCoO@rGO(+) || BOC@rGO(-) at varying concentrations of EG. (b) Linear curve of catalytic current for formate synthesis vs. EG concentration at 1.9 V cell voltage.

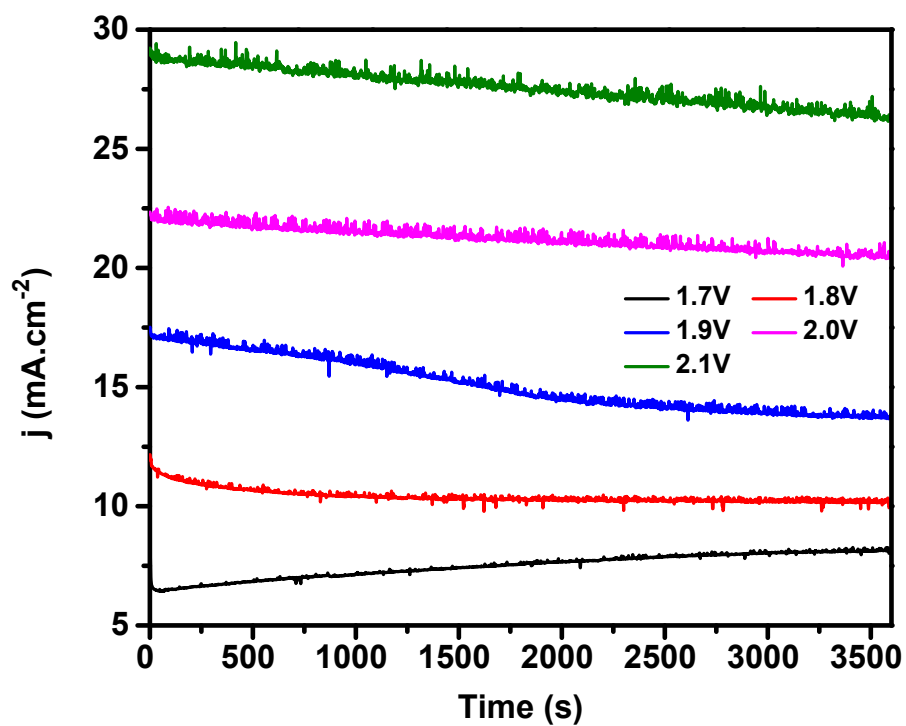

**Figure S28.** CPE analysis at various potentials in a 2-electrode system.

**Table S1.** Concentration of different elements in the electrolyte obtained from ICP-MS analysis during the long-term stability tests.

|                     | <b>Before electrolysis (mg/L)</b> | <b>After electrolysis (mg/L)</b> |
|---------------------|-----------------------------------|----------------------------------|
| <b>Bismuth (Bi)</b> | 0.16                              | 0.96                             |
| <b>Copper (Cu)</b>  | 0.18                              | 0.66                             |
| <b>Cobalt (Co)</b>  | <0.005                            | <0.005                           |
